# Supplementary material for: Benzothiadiazole enhances ascorbate recycling and polyphenols accumulation in blueberry in a cultivar-dependent manner
Source: PubMed Central journal article supplement (PMC9780449; doi:10.3389/fpls.2022.1032133), 2022-12-09
Supplement: DataSheet_1.pdf [file DataSheet_1.pdf]

## Supplemental

Chromatograms integrated at 520 nm of blueberry fruits at higher content in glycosylated anthocyanidins.



Compounds identified in the analyzed samples. For each compound is reported the retention time (RT, min),  $\lambda_{\max}$  (nm), HR-Mass of the  $M^+$ , molecular formula and fragment ions  $M^+$ .

| Peak | RT (min) | $\lambda_{\max}$ | $[M]^+$  | Formula              | Fragment ion $[M]^+$ | Formula           | Peak identification |
|------|----------|------------------|----------|----------------------|----------------------|-------------------|---------------------|
| 1    | 10,0     | 515              | 465,1026 | $C_{21}H_{21}O_{12}$ | 303,0499             | $C_{15}H_{11}O_7$ | D-gal               |
| 2    | 14,0     | 515              | 465,1026 | $C_{21}H_{21}O_{12}$ | 303,0500             | $C_{15}H_{11}O_7$ | D-glc               |
| 3    | 15,0     | 515              | 449,1079 | $C_{21}H_{21}O_{11}$ | 287,0548             | $C_{15}H_{11}O_6$ | Cy-gal              |
| 4    | 17,0     | 515              | 435,0920 | $C_{20}H_{19}O_{11}$ | 303,0500             | $C_{15}H_{11}O_7$ | D-ara               |
| 5    | 22,0     | 515              | 449,1079 | $C_{21}H_{21}O_{11}$ | 287,0548             | $C_{15}H_{11}O_6$ | Cy-glc              |
| 6    | 24,0     | 515              | 419,1000 | $C_{20}H_{19}O_{10}$ | 287,0548             | $C_{15}H_{11}O_6$ | Cy-ara              |
| 7    | 25,0     | 515              | 479,1180 | $C_{22}H_{23}O_{12}$ | 317,0655             | $C_{16}H_{13}O_7$ | Pet-gal             |
| 8    | 28,5     | 515              | 479,1180 | $C_{21}H_{21}O_{12}$ | 317,0655             | $C_{16}H_{13}O_7$ | Pet-glc             |
| 9    | 29,0     | 515              | 463,1232 | $C_{22}H_{23}O_{11}$ | 301,0705             | $C_{13}H_{13}O_6$ | Peo-gal             |
| 10   | 30,2     | 515              | 433,1127 | $C_{21}H_{21}O_{11}$ | 317,0655             | $C_{16}H_{13}O_7$ | Pet-ara             |
| 11   | 32,0     | 515              | 463,1232 | $C_{22}H_{23}O_{11}$ | 301,0705             | $C_{13}H_{13}O_6$ | Peo-glc             |
| 12   | 32,5     | 515              | 493,1339 | $C_{23}H_{25}O_{12}$ | 331,0810             | $C_{17}H_{15}O_7$ | Mv-gal              |
| 13   | 33,2     | 515              | 433,1128 | $C_{21}H_{21}O_{10}$ | 301,0705             | $C_{13}H_{13}O_6$ | Peo-ara             |
| 14   | 34,5     | 515              | 493,1339 | $C_{23}H_{25}O_{12}$ | 331,0810             | $C_{17}H_{15}O_7$ | Mv-glc              |
| 15   | 35,4     | 515              | 463,1231 | $C_{22}H_{23}O_{11}$ | 331,0810             | $C_{17}H_{15}O_7$ | Mv-ara              |
| 16   | 37,0     | 515              | 507,1127 | $C_{23}H_{23}O_{13}$ | 303,0490             | $C_{15}H_{11}O_7$ | D-Hex-Ac            |
| 17   | 40,0     | 515              | 491,1180 | $C_{23}H_{23}O_{12}$ | 287,0548             | $C_{15}H_{11}O_6$ | Cy-Hex-Ac           |
| 18   | 41,0     | 515              | 521,1280 | $C_{24}H_{25}O_{13}$ | 317,0655             | $C_{16}H_{13}O_7$ | Pet-Hex-Ac          |
| 19   | 42,0     | 515              | 535,1444 | $C_{25}H_{27}O_{13}$ | 331,0810             | $C_{17}H_{15}O_7$ | Mv-gal-Ac           |
| 20   | 43,4     | 515              | 505,1330 | $C_{24}H_{25}O_{12}$ | 301,0705             | $C_{13}H_{13}O_6$ | Peo-Hex-Ac          |
| 21   | 44,5     | 515              | 535,1445 | $C_{25}H_{27}O_{13}$ | 331,0810             | $C_{17}H_{15}O_7$ | Mv-glc-Ac           |

D: Delphinidin, Cy: Cyanidin, Pet: Petunidin, Peo: Peonidin, Mv: Malvidin, gal: galactose, glc: glucose, ara: arabinose, Hex: Hexose, Ac: acetate.
