# Supplementary material for: Benzothiadiazole enhances ascorbate recycling and polyphenols accumulation in blueberry in a cultivar-dependent manner
Source: PubMed Central journal article supplement (PMC9780449; doi:10.3389/fpls.2022.1032133), 2022-12-09
Supplement: DataSheet_2.pdf [file DataSheet_2.pdf]

## Statistic output of the two-way anova

**Fig. 3A**

| TTA DUKE            |         |                 | TTA BRIGITTA        |         |                 |
|---------------------|---------|-----------------|---------------------|---------|-----------------|
| Source of Variation | P value | P value summary | Source of Variation | P value | P value summary |
| Interaction         | 0,0054  | **              | Interaction         | 0,0037  | **              |
| RIPENING STAGE      | <0.0001 | ****            | RIPENING STAGE      | <0.0001 | ****            |
| TREATMENT           | 0,0142  | *               | TREATMENT           | 0,4728  | ns              |

**Fig. 3B**

| DM DUKE             |         |                 | DM BRIGITTA         |         |                 |
|---------------------|---------|-----------------|---------------------|---------|-----------------|
| Source of Variation | P value | P value summary | Source of Variation | P value | P value summary |
| Interaction         | 0,0007  | ***             | Interaction         | 0,0037  | **              |
| RIPENING STAGE      | <0.0001 | ****            | RIPENING STAGE      | <0.0001 | ****            |
| TREATMENT           | <0.0001 | ****            | TREATMENT           | 0,0162  | *               |

**Fig. 3C**

| TSS DUKE            |         |                 | TSS BRIGITTA        |         |                 |
|---------------------|---------|-----------------|---------------------|---------|-----------------|
| Source of Variation | P value | P value summary | Source of Variation | P value | P value summary |
| Interaction         | 0,0089  | **              | Interaction         | 0,3143  | ns              |
| RIPENING STAGE      | <0.0001 | ****            | RIPENING STAGE      | <0.0001 | ****            |
| TREATMENT           | 0,0025  | **              | TREATMENT           | 0,0005  | ***             |

**Fig. 3D**

| AsA DUKE            |         |                 | AsA BRIGITTA        |         |                 |
|---------------------|---------|-----------------|---------------------|---------|-----------------|
| Source of Variation | P value | P value summary | Source of Variation | P value | P value summary |
| Interaction         | <0.0001 | ****            | Interaction         | 0,9509  | ns              |
| RIPENING STAGE      | <0.0001 | ****            | RIPENING STAGE      | <0.0001 | ****            |
| TREATMENT           | <0.0001 | ****            | TREATMENT           | 0,5677  | ns              |

**Fig. 4A**

| APX DUKE            |         |                 | APX BRIGITTA        |         |                 |
|---------------------|---------|-----------------|---------------------|---------|-----------------|
| Source of Variation | P value | P value summary | Source of Variation | P value | P value summary |
| Interaction         | 0,0196  | *               | Interaction         | 0,0039  | **              |
| RIPENING STAGE      | 0,5861  | ns              | RIPENING STAGE      | <0.0001 | ****            |
| TREATMENT           | <0.0001 | ****            | TREATMENT           | 0,0001  | ***             |

**Fig. 4B**

| MDHAR DUKE          |         |                 | MDHAR BRIGITTA      |         |                 |
|---------------------|---------|-----------------|---------------------|---------|-----------------|
| Source of Variation | P value | P value summary | Source of Variation | P value | P value summary |
| Interaction         | 0,2599  | ns              | Interaction         | 0,6106  | ns              |
| RIPENING STAGE      | <0.0001 | ****            | RIPENING STAGE      | 0,0002  | ***             |
| TREATMENT           | <0.0001 | ****            | TREATMENT           | 0,1242  | ns              |

**Fig. 4C**

| DHAR DUKE           |         |                 | DHAR BRIGITTA       |         |                 |
|---------------------|---------|-----------------|---------------------|---------|-----------------|
| Source of Variation | P value | P value summary | Source of Variation | P value | P value summary |
| Interaction         | 0,0126  | *               | Interaction         | 0,8102  | ns              |
| RIPENING STAGE      | <0.0001 | ****            | RIPENING STAGE      | 0,001   | **              |
| TREATMENT           | 0,1245  | ns              | TREATMENT           | 0,0014  | **              |

**Fig. 4D**

| GR DUKE             |         |                 | GR BRIGITTA         |         |                 |
|---------------------|---------|-----------------|---------------------|---------|-----------------|
| Source of Variation | P value | P value summary | Source of Variation | P value | P value summary |
| Interaction         | <0.0001 | ****            | Interaction         | 0,8356  | ns              |
| RIPENING STAGE      | <0.0001 | ****            | RIPENING STAGE      | 0,0384  | *               |
| TREATMENT           | <0.0001 | ****            | TREATMENT           | 0,1354  | ns              |

**Fig. 5A**

| DUKE PHENOLICS      |         |                 | BRIGITTA PHENOLICS  |         |                 |
|---------------------|---------|-----------------|---------------------|---------|-----------------|
| Source of Variation | P value | P value summary | Source of Variation | P value | P value summary |
| Interaction         | 0,0835  | ns              | Interaction         | 0,9679  | ns              |
| RIPENING STAGE      | <0.0001 | ****            | RIPENING STAGE      | 0,0038  | **              |
| TREATMENT           | <0.0001 | ****            | TREATMENT           | <0.0001 | ****            |

**Fig. 5B**

| DUKE ANTHOCYANINS   |         |                 | BRIGITTA ANTHOCYANINS |         |                 |
|---------------------|---------|-----------------|-----------------------|---------|-----------------|
| Source of Variation | P value | P value summary | Source of Variation   | P value | P value summary |
| Interaction         | 0,0049  | **              | Interaction           | 0,0012  | **              |
| RIPENING STAGE      | <0.0001 | ****            | RIPENING STAGE        | <0.0001 | ****            |
| TREATMENT           | <0.0001 | ****            | TREATMENT             | <0.0001 | ****            |

**Fig. 5C**

| DUKE FLAVONOIDS     |         |                 | BRIGITTA FLAVONOIDS |         |                 |
|---------------------|---------|-----------------|---------------------|---------|-----------------|
| Source of Variation | P value | P value summary | Source of Variation | P value | P value summary |
| Interaction         | 0,8866  | ns              | Interaction         | 0,5511  | ns              |
| RIPENING STAGE      | <0.0001 | ****            | RIPENING STAGE      | <0.0001 | ****            |
| TREATMENT           | <0.0001 | ****            | TREATMENT           | <0.0001 | ****            |

**Fig. 6A left ( $\mu\text{g/g}$ )**

| DELPH DUKE          |         |                 |
|---------------------|---------|-----------------|
| Source of Variation | P value | P value summary |
| Interaction         | <0.0001 | ****            |
| RIPENING STAGE      | <0.0001 | ****            |
| TREATMENT           | <0.0001 | ****            |

| CYAN DUKE           |         |                 |
|---------------------|---------|-----------------|
| Source of Variation | P value | P value summary |
| Interaction         | <0.0001 | ****            |
| RIPENING STAGE      | <0.0001 | ****            |
| TREATMENT           | <0.0001 | ****            |

| PETUN DUKE          |         |                 |
|---------------------|---------|-----------------|
| Source of Variation | P value | P value summary |
| Interaction         | <0.0001 | ****            |
| RIPENING STAGE      | <0.0001 | ****            |
| TREATMENT           | <0.0001 | ****            |

| PEON DUKE           |         |                 |
|---------------------|---------|-----------------|
| Source of Variation | P value | P value summary |
| Interaction         | <0.0001 | ****            |
| RIPENING STAGE      | <0.0001 | ****            |
| TREATMENT           | <0.0001 | ****            |

| MALV DUKE           |         |                 |
|---------------------|---------|-----------------|
| Source of Variation | P value | P value summary |
| Interaction         | <0.0001 | ****            |
| RIPENING STAGE      | <0.0001 | ****            |
| TREATMENT           | <0.0001 | ****            |

**Fig. 6A right (%)**

| DELPH DUKE          |         |                 |
|---------------------|---------|-----------------|
| Source of Variation | P value | P value summary |
| Interaction         | <0.0001 | ****            |
| RIPENING STAGE      | <0.0001 | ****            |
| TREATMENT           | 0,0552  | ns              |

| CYAN DUKE           |         |                 |
|---------------------|---------|-----------------|
| Source of Variation | P value | P value summary |
| Interaction         | 0,0004  | ***             |
| RIPENING STAGE      | <0.0001 | ****            |
| TREATMENT           | 0,8409  | ns              |

| PETUN DUKE          |         |                 |
|---------------------|---------|-----------------|
| Source of Variation | P value | P value summary |
| Interaction         | <0.0001 | ****            |
| RIPENING STAGE      | <0.0001 | ****            |
| TREATMENT           | <0.0001 | ****            |

| PEON DUKE           |         |                 |
|---------------------|---------|-----------------|
| Source of Variation | P value | P value summary |
| Interaction         | 0,47    | ns              |
| RIPENING STAGE      | <0.0001 | ****            |
| TREATMENT           | 0,1925  | ns              |

| MALV DUKE           |         |                 |
|---------------------|---------|-----------------|
| Source of Variation | P value | P value summary |
| Interaction         | <0.0001 | ****            |
| RIPENING STAGE      | <0.0001 | ****            |
| TREATMENT           | 0,3876  | ns              |

**Fig. 6B left ( $\mu\text{g/g}$ )**

| DELPH BRIGITTA      |         |                 |
|---------------------|---------|-----------------|
| Source of Variation | P value | P value summary |
| Interaction         | <0.0001 | ****            |
| RIPENING STAGE      | <0.0001 | ****            |
| TREATMENT           | <0.0001 | ****            |

| CYAN BRIGITTA       |         |                 |
|---------------------|---------|-----------------|
| Source of Variation | P value | P value summary |
| Interaction         | <0.0001 | ****            |
| RIPENING STAGE      | <0.0001 | ****            |
| TREATMENT           | <0.0001 | ****            |

| PETUN BRIGITTA      |         |                 |
|---------------------|---------|-----------------|
| Source of Variation | P value | P value summary |
| Interaction         | <0.0001 | ****            |
| RIPENING STAGE      | <0.0001 | ****            |
| TREATMENT           | <0.0001 | ****            |

| PEON BRIGITTA       |         |                 |
|---------------------|---------|-----------------|
| Source of Variation | P value | P value summary |
| Interaction         | 0,0003  | ***             |
| RIPENING STAGE      | <0.0001 | ****            |
| TREATMENT           | <0.0001 | ****            |

| MALV BRIGITTA       |         |                 |
|---------------------|---------|-----------------|
| Source of Variation | P value | P value summary |
| Interaction         | 0,0021  | **              |
| RIPENING STAGE      | <0.0001 | ****            |
| TREATMENT           | 0,0012  | **              |

**Fig. 6B right (%)**

| DELPH BRIGITTA      |         |                 |
|---------------------|---------|-----------------|
| Source of Variation | P value | P value summary |
| Interaction         | <0.0001 | ****            |
| RIPENING STAGE      | 0,0002  | ***             |
| TREATMENT           | 0,511   | ns              |

| CYAN BRIGITTA       |         |                 |
|---------------------|---------|-----------------|
| Source of Variation | P value | P value summary |
| Interaction         | 0,7163  | ns              |
| RIPENING STAGE      | <0.0001 | ****            |
| TREATMENT           | 0,1687  | ns              |

| PETUN BRIGITTA      |         |                 |
|---------------------|---------|-----------------|
| Source of Variation | P value | P value summary |
| Interaction         | 0,0851  | ns              |
| RIPENING STAGE      | <0.0001 | ****            |
| TREATMENT           | 0,0001  | ***             |

| PEON BRIGITTA       |         |                 |
|---------------------|---------|-----------------|
| Source of Variation | P value | P value summary |
| Interaction         | 0,9676  | ns              |
| RIPENING STAGE      | <0.0001 | ****            |
| TREATMENT           | 0,0018  | **              |

| MALV BRIGITTA       |         |                 |
|---------------------|---------|-----------------|
| Source of Variation | P value | P value summary |
| Interaction         | <0.0001 | ****            |
| RIPENING STAGE      | <0.0001 | ****            |
| TREATMENT           | 0,0576  | ns              |

**Fig. 7A**

| DI-SUBST DUKE       |         |                 |
|---------------------|---------|-----------------|
| Source of Variation | P value | P value summary |
| Interaction         | 0,0013  | **              |
| RIPENING STAGE      | <0.0001 | ****            |
| TREATMENT           | 0,4507  | ns              |

| TRI-SUBST DUKE      |         |                 |
|---------------------|---------|-----------------|
| Source of Variation | P value | P value summary |
| Interaction         | 0,0013  | **              |
| RIPENING STAGE      | <0.0001 | ****            |
| TREATMENT           | 0,4505  | ns              |

| METHOX DUKE         |         |                 |
|---------------------|---------|-----------------|
| Source of Variation | P value | P value summary |
| Interaction         | <0.0001 | ****            |
| RIPENING STAGE      | <0.0001 | ****            |
| TREATMENT           | 0,1637  | ns              |

**Fig. 7B**

| DI-SUBST BRIGITTA   |         |                 |
|---------------------|---------|-----------------|
| Source of Variation | P value | P value summary |
| Interaction         | 0,7463  | ns              |
| RIPENING STAGE      | <0.0001 | ****            |
| TREATMENT           | 0,4336  | ns              |

| TRI-SUBST BRIGITTA  |         |                 |
|---------------------|---------|-----------------|
| Source of Variation | P value | P value summary |
| Interaction         | 0,6465  | ns              |
| RIPENING STAGE      | <0.0001 | ****            |
| TREATMENT           | 0,9967  | ns              |

| METHOX BRIGITTA     |         |                 |
|---------------------|---------|-----------------|
| Source of Variation | P value | P value summary |
| Interaction         | <0.0001 | ****            |
| RIPENING STAGE      | <0.0001 | ****            |
| TREATMENT           | 0,4185  | ns              |
